# Supplementary material for: Magnetic resonance imaging methods for in situ studies in heterogeneous catalysis
Source: Royal Society of Chemistry journal article supplement (doi:10.1039/b919540h), 2010-01-01
Supplement: b919540h.pdf [file b919540h.pdf]

## Electronic Supplementary Information (ESI)

### Magnetic resonance imaging methods for in situ studies in heterogeneous catalysis

Anna A. Lysova<sup>a,b</sup> and Igor V. Koptug<sup>\*a</sup>

<sup>a</sup> International Tomography Center, 3A Institutskaya St., Novosibirsk 630090, Russia. Fax: +7 383 333 1399; Tel: +7 383 333 3561; E-mail: koptug@tomo.nsc.ru

<sup>b</sup> Boreskov Institute of Catalysis, 5 Ac. Lavrentiev Pr., Novosibirsk 630090, Russia

#### MOVIE

**Supplementary Movie.** The succession of images detected during the hydrogenation of AMS on a single catalyst pellet (right) in combination with the temperature data (left). Green vertical lines separate intervals during which the liquid AMS supply rate remains constant ( $8.2 \times 10^{-4}$ ,  $8.6 \times 10^{-4}$ ,  $7.1 \times 10^{-4}$ ,  $6.4 \times 10^{-4}$ ,  $5.8 \times 10^{-4}$ ,  $7.3 \times 10^{-4}$  g/s). The dynamic processes are shown 340 times faster than in the actual experiment.
